# Supplementary material
Source: Springer Nature journal article supplement (https://www.springerprofessional.de/resource/supplementary/13638_2012_566_MOESM5_ESM.pdf/11897892)

Signal-to-noise-plus-interference ratio (dBm)

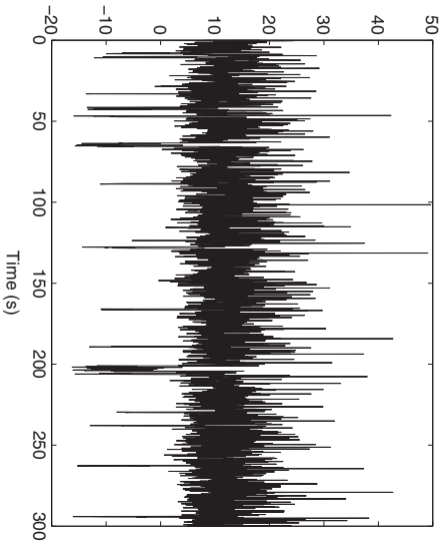

Supplement: MOESM5 [file 11897892]
